# Supplementary material
Source: Research Square preprint supplement (doi:10.21203/rs.3.rs-9156954/v1)
Supplement: Supplementary file 1 [file eb17c5101d9bc828f3a37456.docx]

23/03/2026

To,

The Editor-in-Chief

Discovery Health System.

Dear Sir/Ma,

**COVERING LETTER**

This manuscript titled “**Assessment of concern experiences and satisfaction with antenatal ultrasound among postnatal women in Ibadan Nigeria”** described the concerns and satisfactions of postnatal women on the ultrasound scans they did while pregnant in University College Hospital and some private ultrasound scan facilities in Ibadan. We intend to publish it in your esteemed journal. It is an original article which has not been published in any other journal. The authors have contributed significantly in conception of the topic, proposal writing, data collections and the manuscript writing. All the authors declare no conflict of interest and have agreed to publish the manuscript in your noble journal.This manuscript is relevant and it addresses one of the contemporary issues in Obstetrics which is the experience and perspectives of the postnatal women about the obstetric scans during antenatal period in one of the low and middle income countries. It will also add to the body of knowledge in Obstetric Ultrasonography and help improve the service deliveries in the facilities studied. Thank you.

Yours sincerely,


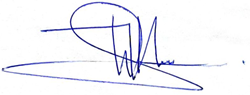


**Corresponding author:**

Dr Olaolu Olayinka Oni.

Consultant Obstetrician and Gynecolgist/ Lecturer

University College Hospital/ University of Ibadan, Ibadan.

08062087527 [olaoluoni43@yahoo.com](mailto:olaoluoni43@yahoo.com)
